# Supplementary material for: Chitosan oligosaccharide ameliorated obesity by reducing endoplasmic reticulum stress in diet-induced obese rats
Source: Royal Society of Chemistry journal article supplement (doi:10.1039/d0fo01107j), 2020-01-01
Supplement: d0fo01107j1.pdf [file d0fo01107j1.pdf]

## Electronic supplementary information

Table S1. Reagents, materials and laboratory animal information

| Materials                           | Catalog No.   | Company                                                                 |
|-------------------------------------|---------------|-------------------------------------------------------------------------|
| COST (Mw ≤ 1,000 Da)                | 160926C       | Shangdong AK Biotech Co., Ltd. (Qingdao, Shandong, China)               |
| Orlistat                            | 2016120860088 | Zhongshan Wanhan Pharmaceutical Co., Ltd. (Guangzhou, Guangdong, China) |
| BCA Protein Concentration Assay Kit | P0011         | Beyotime Biotechnology Co., Ltd. (Shanghai, China)                      |
| LEICA Paraplast High Melt Paraffin  | 39601095      | Leica Biosystems melbourne Pty., Ltd. (Melbourne, Australia)            |
| LEICA Paraplast Low Melt Paraffin   | 39603002      | Leica Biosystems melbourne Pty., Ltd. (Melbourne, Australia)            |
| Paraformaldehyde                    | 885233        | Shanghai Macklin Biochemical Co., Ltd. (Shanghai, China)                |
| Hematoxylin-Eosin dye               | DH0006        | Beijing leagene Biotechnology Co., Ltd. (Beijing, China)                |
| Bovine Serum Albumin                | 9048-46-8     | Sigma-Aldrich (USA)                                                     |
| Gibco-Fetal Bovine Serum (FBS)      | 10270-106     | Thermo Fisher Scientific (USA)                                          |
| Gibco-DMEM basic                    | C11995500bt   | Thermo Fisher Scientific (USA)                                          |

Table S2. The primer sequences of rats

| Gene          | Forward primer            | Reverse primer               |
|---------------|---------------------------|------------------------------|
| GAPDH         | GTCCATGCCATCACTGCCACTC    | CGCCTGCTTCACCACCTTCTTG       |
| SREBP-1c      | TTCTGCCTTGTGCGGTATGTTGAG  | TCTGCTCCTGAGTGGACCATGAT<br>C |
| FAS           | GTGTGGTAGGCTTGGTGAACCTGTC | GTGAGATGTGCTGCTGAGGTTGG      |
| ACC $\alpha$  | TGGTGAGGATGGCGGCTCTG      | GGTGGTGTGAAGGCGTTGTCC        |
| PPAR $\gamma$ | GAGGACATCCAAGACAACCTGCTG  | GTGCTCTGTGACAATCTGCCTGA<br>G |
| PPAR $\alpha$ | CTGAGGAAGCCATTCTGCGACATC  | GCGTCTGACTCGGTCTTCTTGATG     |
| GRP78         | GGTGGTGAACCTTCGATGT       | ATTCTTCAGGGGTCAGGCG          |
| GRP94         | ATGAAGGCACAAGCATAACCAGACG | TCTGTGGTGTCTTCAGGCTCCTC      |
| ATF4          | GACCGAGATGAGCTTCCTGAACAG  | GTGTCTGAGGCACTGACCAACC       |
| CHOP          | GCCAGCAGAGGTCACAAGCAC     | CTTGAGCCGCTCGTTCTCTTCAG      |

|       |                    |                      |
|-------|--------------------|----------------------|
| XBP1S | CTGAGTCCGCAGCAGGTG | GCTCTCTGTCTCAGAGGGGA |
|-------|--------------------|----------------------|

Table S3. The primer sequences of cells

| Gene          | Forward primer           | Reverse primer           |
|---------------|--------------------------|--------------------------|
| SREBP1        | GCTGTTGGTGCTCGTCTCCTTG   | GCTTGCGATGCCTCCAGAAGTAC  |
| FAS           | GTGGTGGGCTTGGTGAAGTGTG   | AGGTGCTGCTGAGGTTGGAGAG   |
| ACC $\alpha$  | TACCTTCTTCTACTGGCGGCTGAG | GCCTTCACTGTTCTTCCACTTCC  |
| PPAR $\gamma$ | TGAATCCAGAGTCCGCTGACCTC  | ATCGCCCTCGCCTTTGCTTTG    |
| PPAR $\alpha$ | AGGCTATACGGACCACCCAGTTG  | CAGCACAGTCGAGGCAGGTTAATC |
| GRP78         | CCGAGGAGGAGGACAAGAAGGAG  | ACACGCCGACGCAGGAGTAG     |
| GRP94         | GCAACGCTTCGGTCAGGGTATC   | GGTTCTTCTTCGGGCTTCTTCC   |
| ATF4          | ATTCAGGCTTCTCACGGCATTGAG | CACCAACACCTCGCTGCTCAG    |
| CHOP          | TGAACGGCTCAAGCAGGAAA     | GGATTGAGGGTCACATCATTGGCA |

Table S4 Effects of COST on food intake and body weight in rats (n=10)

| group    | food intake (g/d) | initial weight (g)   | final weight (g)     | Weight gain (g)    |
|----------|-------------------|----------------------|----------------------|--------------------|
| SD       | 24.74 $\pm$ 0.62  | 415.03 $\pm$ 24.95** | 504.04 $\pm$ 29.91** | 89.01 $\pm$ 7.61*  |
| HF       | 23.76 $\pm$ 0.62  | 567.82 $\pm$ 13.20   | 708.54 $\pm$ 18.16   | 123.05 $\pm$ 10.20 |
| Orlistat | 25.30 $\pm$ 0.58  | 557.87 $\pm$ 21.07   | 638.73 $\pm$ 24.77*  | 80.86 $\pm$ 7.02** |
| COST-H   | 23.84 $\pm$ 0.46  | 566.57 $\pm$ 11.61   | 630.66 $\pm$ 14.90** | 64.09 $\pm$ 5.98** |
| COST-M   | 24.15 $\pm$ 0.55  | 574.22 $\pm$ 8.15    | 627.22 $\pm$ 11.86** | 53.00 $\pm$ 7.92** |
| COST-L   | 24.21 $\pm$ 0.43  | 576.71 $\pm$ 7.59    | 667.56 $\pm$ 17.79   | 90.84 $\pm$ 11.70* |

\* P< 0.05 and \*\* p < 0.01 vs. the HF group.

Table S5. Effect of COST on adipose tissue weight in rats (n=10)

| group    | Perirenal fat (g) | Epididymal fat (g) | subcutaneous fat (g) | Body fat (g)       | Lipid/body ratio (%) |
|----------|-------------------|--------------------|----------------------|--------------------|----------------------|
| SD       | 7.52 $\pm$ 1.03** | 6.29 $\pm$ 0.73**  | 5.62 $\pm$ 0.81**    | 19.43 $\pm$ 1.86** | 3.90 $\pm$ 0.45**    |
| HF       | 22.41 $\pm$ 2.98  | 16.10 $\pm$ 2.83   | 14.77 $\pm$ 1.52     | 53.28 $\pm$ 6.50   | 7.72 $\pm$ 0.72      |
| Orlistat | 16.06 $\pm$ 0.85* | 10.41 $\pm$ 1.55*  | 10.66 $\pm$ 1.60*    | 37.13 $\pm$ 3.56** | 5.93 $\pm$ 0.53*     |
| COST-H   | 15.64 $\pm$ 2.54* | 10.30 $\pm$ 1.46*  | 11.38 $\pm$ 1.46*    | 37.31 $\pm$ 3.83** | 6.23 $\pm$ 0.55*     |
| COST-M   | 17.08 $\pm$ 0.99* | 11.06 $\pm$ 1.13*  | 13.56 $\pm$ 1.37     | 41.70 $\pm$ 2.17*  | 6.75 $\pm$ 0.26      |
| COST-L   | 19.12 $\pm$ 2.64  | 12.36 $\pm$ 1.61   | 14.30 $\pm$ 2.19     | 45.78 $\pm$ 4.38   | 7.03 $\pm$ 0.57      |

\*P< 0.05 and \*\* p < 0.01 vs. the HF group

Table S6. Effect of COST on serum lipid levels in rats (n=10)

| group    | TC (mmol/L) | TG (mmol/L) | HDL-C (mmol/L) | LDL-C (mmol/L) |
|----------|-------------|-------------|----------------|----------------|
| SD       | 1.81±0.16** | 0.87±0.11** | 0.25±0.02**    | 1.56±0.14**    |
| HF       | 3.19±0.27   | 2.10±0.53   | 0.16±0.01      | 2.34±0.12      |
| Orlistat | 1.67±0.35** | 1.01±0.09** | 0.20±0.02      | 1.42±0.13**    |
| COST-H   | 2.01±0.05** | 1.05±0.18** | 0.23±0.03*     | 1.75±0.23*     |
| COST-M   | 2.07±0.35** | 1.03±0.07** | 0.21±0.02      | 1.93±0.28      |
| COST-L   | 2.26±0.24*  | 1.22±0.21*  | 0.15±0.02      | 2.32±0.21      |

\*P < 0.05 and \*\* p < 0.01 vs. the HF group

Table S7. Effects of COST on liver weight and liver index in rats (n=10)

| group    | Liver weight (g) | Organ index (%) |
|----------|------------------|-----------------|
| SD       | 10.00±0.31**     | 1.82±0.05**     |
| HF       | 14.02±0.64       | 2.04±0.03       |
| Orlistat | 11.92±0.15**     | 1.87±0.03**     |
| COST-H   | 11.44±0.37**     | 1.90±0.03*      |
| COST-M   | 11.92±0.36**     | 1.87±0.02**     |
| COST-L   | 12.31±0.69*      | 1.92±0.06*      |

\*P < 0.05 and \*\* p < 0.01 vs. the HF group

Table S8. Effect of COST on liver lipid levels in rats (n=10)

| group    | TC (mmol/gprot) | TG (mmol/gprot) | FFA (gprot/L) |
|----------|-----------------|-----------------|---------------|
| SD       | 1.56±0.18*      | 0.57±0.10**     | 0.48±0.04**   |
| HF       | 2.85±0.68       | 1.40±0.14       | 0.97±0.08     |
| Orlistat | 1.64±0.23*      | 0.64±0.07**     | 0.48±0.03**   |
| COST-H   | 1.75±0.28*      | 0.50±0.05**     | 0.58±0.06**   |
| COST-M   | 1.93±0.36       | 0.69±0.11**     | 0.69±0.10**   |
| COST-L   | 2.32±0.27       | 0.86±0.04**     | 0.89±0.04     |

\*P < 0.05 and \*\* p < 0.01 vs. the HF group
